# Supplementary material for: Serum Magnesium and Risk of Arteriovenous Fistula Thrombosis in Hemodialysis: A Retrospective Cohort Study
Source: Research Square preprint supplement (doi:10.21203/rs.3.rs-7289523/v1), 2025-10-03
Supplement: Supplementary file 1 [file 43a17935726e5a258209341e.docx]

## **Supplementary file**

## **Table S1. Univariable Cox proportional hazards regression analysis of risk factors associated with AVF thrombosis.**

| Variable | HR (95% CI) | *p*-value |
| --- | --- | --- |
| Magnesium <0.87 mmol/L (T1) | 2.05 (1.33–3.15) | **0.001** |
| Magnesium T2 vs. T1 | 0.48 (0.30–0.77) | **0.002** |
| Magnesium T3 vs. T1 | 0.27 (0.14–0.51) | **<0.0001** |
| Age (per year) | 1.11 (1.07–1.23) | **0.003** |
| Male sex vs. female | 0.68 (0.42–1.07) | 0.09 |
| Smoking status (yes vs. no) | 1.12 (0.76–1.65) | 0.57 |
| Alcohol use (yes vs. no) | 1.19 (0.48–2.94) | 0.71 |
| Diabetes mellitus (yes vs. no) | 1.03 (0.85–1.59) | 0.93 |
| SBP (per 10 mmHg increase) | 1.41 (0.93–2.14) | 0.11 |
| CVD history (yes vs. no) | 1.19 (0.89–1.62) | 0.24 |
| Positive HBV or HCV status (yes vs. no) | 0.18 (0.03–1.36) | 0.13 |
| Dialysis vintage (per year) | 1.01 (0.99–1.006) | 0.35 |
| Blood flow rate (per 10 mL/min increase) | 1.01 (0.99–1.02) | 0.66 |
| spKt/V (per 0.1 increase) | 0.11 (0.03–0.36) | **< 0.0001** |
| Total volume UF (per 100 mL increase) | 1.0 (1.0–1.02) | **0.004** |
| AVF age < 1 year (yes vs. no) | 0.39 (0.16–0.98) | **0.046** |
| Creatinine ((per 10 µmol/L) | 1.03 (0.97–1.17) | 0.68 |
| Urea (per 1 mmol/L) | 1.02 (0.98–1.05) | 0.21 |
| Hemoglobin (per 1 g/L increase) | 1.01 (0.99–1.03) | 0.25 |
| Hematocrit (per 1% increase) | 1.03 (0.97–1.08) | 0.32 |
| PLT (per 50 ×10⁹/L increase) | 1.04 (1.0–1.07) | **0.05** |
| TSAT (per 1% increase) | 0.99 (0.97–1.02) | 0.63 |
| Ferritin (per 100 ng/mL increase) | 1.0 (0.98– 1.05) | 0.82 |
| Total protein (per 1 g/L increase) | 0.97 (0.93–1.01) | 0.18 |
| Albumin (per 1 g/L increase) | 0.91 (0.85–0.97) | **0.003** |
| CRP (per 5 mg/L increase) | 1.09 (0.87–1.24 | 0.89 |
| Glucose (per 1 mmol/L increase) | 0.98 (0.89–1.07) | 0.65 |
| Calcium (per 0.1 mmol/L increase) | 1.44 (1.09–3.25) | **0.02** |
| Phosphate (per 0.1 mmol/L increase) | 1.14 (1.02–3.21) | **0.003** |
| iPTH (per 50 pg/mL increase) | 1.02 (0.94–1.10) | 0.61 |
| Total cholesterol (per 1 mmol/L increase) | 1.17 (0.79–1.46) | 0.53 |
| HDL (per 0.1 mmol/L increase) | 0.85 (0.54–0.93) | 0.004 |
| LDL (per 0.1 mmol/L increase) | 1.01 (0.94–1.05) | 0.86 |
| Triglycerides (per 0.1 mmol/Lincrease) | 1.11 (0.94–1.29) | 0.22 |
| ESA (yes vs. no) | 0.76 (0.51–1.16) | 0.21 |
| Iron therapy (yes vs. no) | 0.75 (0.49–1.17) | 0.19 |
| Statins (yes vs. no) | 0.33 (0.17–0.62) | **< 0.0001** |
| Antihypertensives (yes vs. no) | 1.1 (0.87–5.31) | 0.98 |
| Anticoagulants (yes vs. no) | 1.02 (1.01–3.6) | 0.06 |
| Antiaggregants (yes vs. no) | 1.07 (0.68–1.74) | 0.72 |
| Calcium-based phosphate binders (yes vs. no) | 1.22 (1.05–2.18) | **< 0.0001** |

*Abbreviations: AFV, arteriovenous fistula; CVD, cardiovascular disease; CRP, C-reactive protein; ESA, erythropoiesis-stimulating agent; HBV, hepatitis B virus; HCV, hepatitis C virus; HDL, high-density lipoprotein cholesterol; HR, hazard ratio; iPTH, intact parathyroid hormone; LDL, low-density lipoprotein cholesterol; PLT, platelet count; SBP, systolic blood pressure; spKt/V, single-pool Kt/V; T1, T2, T3, magnesium tertiles (T1 < 0.87 mmol/L; T2: 0.87,0.97 mmol/L; T3 ≥ 0.98 mmol/L); TSAT, transferrin saturation; UF, ultrafiltration volume.*

**Table S2. Collinearity diagnostics for covariates in the multivariable Cox regression model of AVF thrombosis risk.**

| Variable | t | *p*-value | Tolerance | VIF |
| --- | --- | --- | --- | --- |
| Magnesium tertiles | -2.284 | 0.025 | 0.796 | 1.256 |
| Sex | 0.531 | 0.597 | 0.645 | 1.550 |
| Age, years | 0.076 | 0.940 | 0.738 | 1.354 |
| Diabetes | 0.124 | 0.901 | 0.741 | 1.350 |
| Dialysis vintage, years | 3.436 | < 0.001 | 0.774 | 1.291 |
| AVF age < 1 year | -0.029 | 0.977 | 0.862 | 1.160 |
| Hemoglobin, g/L | 1.332 | 0.184 | 0.950 | 1.052 |
| PLT, ˟109/L | 2.593 | 0.012 | 0.670 | 1.493 |
| spKt/V | -1.813 | 0.074 | 0.729 | 1.372 |
| Blood flow rate, mL | 0.183 | 0.856 | 0.746 | 1.340 |
| Total volume UF, mL | 2.291 | 0.025 | 0.687 | 1.456 |
| HDL, mmol/L | -2.305 | 0.196 | 0.011 | 1.053 |
| Albumin, g/L | 0.113 | 0.911 | 0.624 | 1.603 |
| Calcium, mmol/L | 1.186 | 0.240 | 0.803 | 1.246 |
| Phosphate, mmol/L | 0.303 | 0.763 | 0.771 | 1.297 |
| Statins | -2.983 | 0.003 | 0.940 | 1.066 |
| Calcium-based phosphate binders | 0.532 | 0.861 | 0.775 | 1.187 |

*Abbreviations: AVF, arteriovenous fistula; PLT, platelet count; spKt/V, single-pool Kt/V; UF, ultrafiltration; VIF, variance inflation factor.*
